# Supplementary material
Source: publisher figshare collection journal article supplement (https://karger.figshare.com/articles/dataset/_/25449688)
Supplement: Supplementary file 1 [file 1]

**Summary of included domestic articles**

**Single-arm trials**

| First Author (year), Country | Included patients(period, direction, character of tinnitus) | Sample size | Control intervention | Acupoints | Criteria for treatment | Outcomes |
| --- | --- | --- | --- | --- | --- | --- |
| Andrew Jackson(2006), UK(1) | ND, ND, ND | 6 | AT + moxa | TE6, TE17, GB2, BL23, ST25, ST36, ST40, SP6, KI6, KI3, CV4, CV6, LR3, LR8, SI19, HT7 | TCM model | 1. THI 2. MYMOP |
| YING-HSU JUAN(2019), taiwan(2) | Chronic(6 months<), ND, ND | 78 | AT + 1) narrowed-band noise masking,  2) cognitive behavioral Therapy | TE21, SI19, GB2 | ND | 1. THI |
| DONG Youkang, WANG Yi(2016), China(3) | ND, ND, ND | 95 | AT + medication | GB20, SI17, TE16, Ex-HN14, SI19, GB2, TE21, TE6, LR3, GB40, TE5, LI4, KI3, KI6 | TCM model | 1. VAS 2. THI 3. TSIS |
| 刘翔维(2019), China(4) | Chronic(0.5 year<), ND, right-handed | 8 | AT | SI19, GB2, TE17, GB8, GB20, TE3 | experience of clinical acupuncturists | 1. VAS 2. THI |
| 李洋, 李瑞(2017), China(5) | ND, ND, ND | 62 | AT | GV20, GB20, GV16, TE17, GB12, SI19, GB2, TE6, TE3, LI4, TE5, LR3, GB40, ST40, PC8, SP10 | conventional + follow SD | 1. VAS 2. THI |
| 马圆(2018), China(6) | Chronic(<5 years), ND, ND | 37 | EA | GB12, GB20, GB8, TE3, TE5, GB34, GB41, 颈夹脊, TE17, GB2, LI11, BL23, KI3, ST36, SP6, LI4 | ND + follow SD | 1. VAS 2. THI 3. TSIS |
| Wang Yuemei(2021), China(7) | Chronic(3-12 months), ND, THI>18 and with hearing level of>25dB and neurogenic | 120 | Warm needling | GB2, TE17, SI19, GB20, BL23, SP6, LR2, GB44, ST36, BL20, PC6, LR3 | ND | 1. THI |
| 张璐(2019), China(8) | Varied(1 week-2 years), ND, idiopathic and tinnitus degree 2≤ | 60 | AT + Auricular acupuncture | SI19, GB2, TE21, TE17, GB12, GV20, Ex-HN1, GV16, GV9, GV4, BL23, PC6, KI3 | ND | 1. THI |
| 郑良玉(2019), China(9) | ND, ND, ND | 60 | EA | SI19, GB2, TE5, TE3, TE17, GV20, BL10, 颈夹脊穴, GB20, GV16, LI4, LR3, GB40, ST40, SP9 | ND | 1. VAS 2. THI |
| 朱梦蝶(2017), China(10) | ND, ND, without hearing loss | 60 | EA + medication | TE21, SI19, GB2, TE17 | literature | 1. THI 2. ABR |
| 张雅婷, et al.(2023), China(11) | ND, right-handed, subjective, TEQ 2-5 | 80 | AT+EA | GV15, GV20, SI19, GB11, GB8 | ND | (1) TEQ  (2) THI  (3) VAS |

Abbreviations: ND: Not described, AT: acupuncture treatment, TCM: traditional Chinese medication, SDS: zung self-rating depression scale, IRT: infrared thermography, MYMOP: Measure Your Medical Outcome Profile, CGI-I: Clinical Global Impression-Improvement scale, EA: electro-acupuncture treatment, TEOAE: transient evoked otoacoustic emissions, TSIS: tinnitus severity assessment scale, ABR: Auditory Brainstem Response

**Open-label RCTs**

| First Author (year), Country | Included patients(period, direction, character of tinnitus) | Sample size | Control intervention(TG/CG) | Acupoints | Criteria for treatment | Outcomes |
| --- | --- | --- | --- | --- | --- | --- |
| TU(2019), China(12) | 3 months<, one or both sides, ND | 30 | AT(deep) / AT(shallow) | GV20, GV24, TE5, GB41, GB2 | ND | 1. THI 2. HRV |
| Bong Hyun Kim(2017), korea(13) | 2 weeks<, ND, idiopathic | 42 | AT / periauricular EA / distal EA | TE17, TE21, SI19, GB2, GB8, TE3, TE9, ST36, ST37 | previous study, TCM model | 1. VAS 2. THI |
| Young-Kyun Moon , Bong Hyun Kim (2020), Korea(14) | Chronic(6 months<), ND, consecutive | 45 | AT / EA / TENS | TE21, SI19, GB2, TE22, ST7, TE17, KI3, TE5, GB20 | previous study | 1. VAS 2. THI 3. PTA 4. SDa |
| Mohammad Berjis Ghahfarokhi(2018), China(15) | 2 months<, one or both sides, ND | 64 | AT / medication | TE17, GB2, ST6, ST7, GB34, TE5, GB20, Ex-HN1, LV3, GB43, LI4, LI11, KI6, PC6, CV12, ST40 | conventional + follow SDb | 1. VAS 2. THI |
| Tsoi Mo Ning(2018), China(16) | 3 months<, ND, ND | 60 | EA / AT | TE21, SI19, KI3, KI6 | literature | 1. VAS 2. THI |
| 耿坚雯, 王黎(2018), China(17) | ND, ND, ND | 60 | AT + H-med / AT | TE21, SI19, GB2, TE17, GB12, GB20, TE5, TE3, GB34, LR3, GB41 | ND | 1. THI |
| 高嘉琳, 翟军(2018), China(18) | ND, ND, ND | 136 | EA / Warm needling | GB2, TE3, SI19, GB43, TE21, 競风, GB20, GV20, 豁风 | ND | 1. THI |
| 高云竹(2015), China(19) | 0.5-3 years, ND, THI>18 and subjective | 60 | EA / medication | TE21, SI19, GB2, TE17, TE3, GB43, GB20, TE5, LI4, LR2, GB40, GB41, ST40, ST44, 皆俞, KI3, CV4, CV6, ST36, BL20 | ND | 1. THI |
| 郭佳(2018), China(20) | 2 years<, ND, idiopathic and 脾胃虚弱型 or 肾精亏虚型 | 60 | AT / AT | SI19, TE17, GB8, GV20, LI4, LR3, ST36, SP6, KI3, CV12, CV10, CV6, CV4, ST24, SP15, KI17, KI13, KI19 | literature | 1. THI 2. TSIS 3. HAMA |
| DUAN Sheng-de et al.(2016), China(21) | 3 months<, ND, ND | 53 | Warm needling / medication | TE21, 中白, 下白 | ND | 1. VAS 2. THI |
| 梁修朗(2018), China(22) | ND, ND, ND | 60 | AT / medication | GV20, TE21, GB2, TE17, CV6, PC6, ST25, LR3, ST36, SP6 | ND | 1. THI 2. HAMA 3. HAMD |
| 鲁佳(2019), China(23) | 3 months-1 year, ND, ND | 64 | AT + Burning acupuncture / AT | TE21, SI19, GB2, TE17, TE3, GB43, GB20, TE5, LI4, LR2, GB40, GB41, ST40, ST44, BL23, KI3, CV4, CV6, ST36, BL20, TE1, GB44 | literature | 1. THI 2. TEQ |
| 刘佳慈(2018), China(24) | ND, ND, 肾精亏虚型 | 70 | AT / AT | SI19, TE17, KI3, BL23 | literature | 1. THI |
| 刘仕伟(2019), China(25) | ND, ND, ND | 66 | AT + H-med / H-med | GB2, GB3, GB8, GB20, GB43, LR3, TE17, TE21, TE3, TE5 | literature | 1. VAS 2. THI 3. TEQ 4. SAS 5. SDS |
| LIU Yan(2020), China(26) | 3 months<, ND, ND | 76 | AT / AT | TE21, SI19, GB2, TE17, TE3, GB43, CV6, ST36, BL20, : 指驷马穴, 阴阳九针小周天, 阴阳九针耳双针, 三叉三穴, 中白穴, 下白穴 | conventional | 1. THI 2. HADS 3. PSQI |
| Liu Yong(2016), China(27) | ND, ND, neurogenic and 肾精亏虚型 | 60 | AT / AT | TE21, TE17, TE3, GB43, KI3, CV4, BL23 이혈: 肾, 肝, 胆, 三焦, 内耳, 外耳, 颞, 皮质下 | literature | 1. THI |
| LI Li, et, al(2018), China(28) | 7 days<, ND, neurogenic | 80 | AT + moxa / medication | 翳聪, 耳灵, GB2, TE20, TE17, SI19, ST36, SP9, CV6, LR3 GB34, KI3, BL23, ST40, LR2, LI11, GV14 | TCM model +follow SDb | 1. THI |
| LI Xin(2017), China(29) | ND, ND, 頸原性 | 160 | AT + massage + H-med / H-med | GB20, GV16, GV14, TE17, SI19, TE21, TE5, LI4, LR3, ST40, SP6, ST36, GB40 | ND | 1. THI 2. TCD |
| LI Jing(2016), China(30) | ND, ND, ND | 101 | AT / AT / physical therapy(laser, ultrashort wave) | SI19, GB2, TE17, TE3, TE5, GB43, LR3, GB40 | ND | 1. THI |
| LI Jing-jing(2019), China(31) | <1 year, ND, neurogenic | 90 | AT / H-med | TE17, GB8, TE20, TE3, TE5, ST36, SP6, LR3 | ND | 1. THI 2. 耳鸣频率检查(이명주파수검사) 3. LM |
| 李珍珍(2018), China(32) | 6-24 months, ND, idiopathic and tinnitus degree 2-4 | 66 | AT / AT | TE21, SI19, GB2, TE17, GV20, CV17, CV6, ST36, TE5, LI4, GB40, LR3, ST44, ST40, KI7, KI3, CV12 | conventional + follow SDb | 1. VAS 2. THI |
| 李鑫(2021), China(33) | Acute(<3 months), ND, idiopathic and 肝胆火旺型 | 60 | AT + collateral bloodletting / AT | GV20, GV24, TE21, SI19, GB2, TE20, TE17, TE5, KI9, GB40, LR3, GB41, Ex-HN6 | conventional | 1. VAS 2. THI 3. TEQ |
| 马莉, 陈玉(2020), China(34) | ND, ND, with a hearing level of 25dB< & THI 18≤ | 90 | AT / AT / medication | GB2, TE21, SI19, GB20, TE17, LR2, GB44, PC6, LR3，BL23, SP6, ST36, BL20 | ND | 1. THI 2. 耳鸣频率检查(이명주파수검사) |
| FAN Xiao-li(2014), China(35) | ND, ND, subjective | 68 | AT + H-med / medication | TE21, SI19, GB2, TE17, TE3, BL23, CV4, LR3, GB40, HT8, HT9, ST36, SP6 | ND + follow SDb | 1. THI 2. SCL-90 |
| 伏云鹤(2019), China(36) | 3 months-3 years, one or both sides, kidney-essence deficiency and neurological | 70 | AT / AT | KI13, CV12, CV10, CV6, CV4, KI17, ST24, KI19, TE17, SI19, GB2, TE21, GB8, TE3, GB43, KI3, BL23 | literature | 1. VAS 2. THI 3. TSQ |
| 封宇(2020), China(37) | <6 months, ND, ND | 60 | AT / AT | TE21, SI19, GB2, GB12, TE17, TE3, TE2, GB43, GB42, LR3, KI1, GB40, KI6 | literature | 1. VAS 2. THI 3. TEQ |
| SHI Lei(2016), China(38) | ND, ND, idiopathic and liver qi stagnation pattern/syndrome | 384 | AT / AT | GV20, GB8, SI19, GB2, TE18, GB34, TE3 | conventional | 1. THI 2. HAMA |
| 聂晓琳(2019), China(39) | 2 weeks-2 years, ND, with sudden deafness | 32 | AT / H-med | TE21, SI19, GB2, GB8, TE17, GB20, TE5, TE3 | ND | 1. VAS 2. THI 3. TEQ 4. PSQI 5. PTA 6. SAS |
| 宋珊(2021), China(40) | ND, ND, neurogenic | 66 | AT / AT | 颈夹脊穴(C3～6), SI19, GB2, GB12, TE21, TE17 | literature | 1. THI 2. TEQ |
| SONG Chun-xia(2020), China(41) | 1-12 months, ND, neurogenic tinnitus due to phlegm stasis blocking collaterals | 80 | AT + H-med / none | TE21, SI19, GB2, CV12, ST40, SP10, TE17, TE3, Ex-HN1 | ND | 1. THI 2. TSQ |
| 申一鸣(2018), China(42) | (repeated 1 month≤ or continuous 5 days≤) & less than 1 year, ND, idiopathic | 40 | intradermal needle / medication | TE21, TE17, GB20, KI3, BL23, SP10 | ND | 1. VAS 2. THI 3. TRQ 4. THQ 5. TQ 6. DASS-21 |
| CHEN Surong(2018), China(43) | repeated 1 month≤ or continuous 5 days≤, ND, idiopathic and tinnitus degree 2≤ | 60 | AT + H-med / H-med | TE21, SI19, GB2, TE17, 头部晕听区, TE3, GV20 | ND | 1. THI 2. TSS |
| 安声潘(2019), China(44) | ND, ND, idiopathic | 62 | AT / AT | 耳聋, TE21, SI19, GB2, 縣风, TE3, GB43, LI4, LR3 | conventional | 1. THI 2. TEQ 3. HAMA |
| 於力(2018), China(45) | <3 months, ND, idiopathic | 60 | AT / H-med | TE21, GB2, SI19, TE3, TE5, KI3, GB39 | ND | 1. THI 2. SAS 3. PSQI |
| 王琳(2020), China(46) | 1-24 months, ND, neurogenic | 60 | AT / AT | SI19, TE17, TE3, GB20, LR3, TE5 | ND | 1. THI |
| 王芳瑜(2017), China(47) | ND, ND, ND | 60 | AT / AT | GV20, GV16, GV14, GB2, TE17, TE3, TE5, LI4, LR2, GB40, ST40, GB34, SP10, LR3, GB43, KI3, KI6, ST36, SP6, Ex-HN1, TE21, SI19, GB12, HT7, PC6 | literature | 1. VAS 2. THI 3. SAS |
| WANG Hao(2018), China(48) | ND, ND, neurogenic and 肾精亏虚型 | 86 | AT + medication / medication | TE17, GB2, GB43, TE3, KI3, KI6, SI19, BL23, CV4, SP6, SP10, BL17, ST36, CV6, BL20, CV12, ST40, ST7 | ND | 1. THI |
| WANG Xiaoling(2016), China(49) | ND, ND, idiopathic | 54 | AT + physical therapy / AT | SI19, GB2, TE17, GB43, TE3, LR3, LI11, ST40, ST44, BL18, BL23, KI3, ST36, CV12, BL20, BL21, TE21 | literature | 1. THI |
| YAO Yanling(2020), China(50) | 9 days-1 month, ND, 心肝火旺 | 90 | AT + bloodletting / AT / medication | TE17, BL15, BL18, SI19, GB2, TE3, GB43, HT7, PC6, LR3 | literature | 1. THI 2. HAMA 3. HAMD |
| 尹韬(2013), China(51) | ND, ND, subjective | 50 | AT / AT | TE17, TE21, GB2, TE6, TE3, LI4 | ND | 1. VAS 2. THI |
| 尹韬(2015), China(52) | 3 months≤, ND, subjective | 50 | AT(deep) / AT(shallow) | TE17, GB2, TE21, TE6, TE3, LI4 | ND | 1. VAS 2. THI |
| 张觉予(2018), China(53) | ND, ND, 肾精亏损型 | 66 | AT / AT | BL15, CV14, BL23, GB25, BL28, CV3, BL27, KI3, KI7, TE21, SI19, GB2, TE17, TE3, GB43 | ND | 1. THI |
| Zhang Xiuyun(2017), China(54) | ND, ND, 肾精亏损型 | 30 | AT + Auricular acupuncture + moxa / AT | TE21, SI19, GB2, TE17, LI4, GB20, GB40, ST40, BL21, ST36, BL23, KI3, TE3, CV12, CV10, CV6, CV4 이혈 : 肾上腺, 交感, 肾, 内耳, 肝, 外耳, 内分泌, | ND | 1. THI |
| Zhang Shun(2020), China(55) | <6 months, ND, ND | 72 | AT / AT | SI19, TE3, KI3, TE17, BL23 | literature | 1. THI |
| 张宁(2018), China(56) | ≤5 years , ND, 3≤TEQ and 2≤THI | 55 | AT / AT | TE21, SI19, GB2, TE17, GB20, LR3, ST40, ST36 | ND | 1. THI 2. TEQ |
| 张前福(2019), China(57) | ND, ND, 肾精亏损型 | 78 | AT / AT | 董氏奇穴 : 驷马, 肾关, TE21, SI19, GB2, TE17, TE3, GB43, KI3, CV4 | ND | 1. THI 2. HAMA 3. PSQI |
| 张会会(2017), China(58) | ND, ND, neurogenic and 肾精亏虚型 | 60 | AT + moxa / AT | TE3, SI19, GB2, TE17, BL23, KI3, CV4 | literature | 1. THI |
| Ting Ho(2019), China(59) | ND, ND, neurogenic and 肾精亏损型 | 100 | AT / H-med | GV20, Ex-HN3, SI19, PC6, CV6, CV4, KI3, TE21, GB2, TE17, GB20, GB12 | ND | 1. THI 2. THQ |
| CAO Yi(2014), China(60) | ND, ND, ND | 98 | AT / EA / medication | GV20, GB20, GV16, TE17, GB12, SI19, GB2, TE6, TE3, LI4, TE5, LR3, GB40, ST40, PC8, KI3, SP6, SP9 | ND | 1. VAS 2. THI |
| 钟玉梅(2018), China(61) | repeated 1 month≤ or continuous 5 days≤, ND, neurogenic | 60 | AT / AT + moxa | TE17, GB2, TE3, ST36, LR3 | ND | 1. THI |
| 钟玉梅, et al.(2019), China(62) | repeated 1 month≤, ND, ND | 60 | AT + moxa / AT | TE17, GB2, TE3, ST36, LR4 | ND | 1. THI |
| Zhong Ziqi(2017), China(63) | ND, ND, 肾精亏虚型 | 60 | AT + Auricular acupuncture / AT | BL23, KI3, CV4, TE21, SI19, GB2, TE17, TE3 이혈 : 肾, 皮质下, 内耳, 外耳, 肝, 胆, 三焦, | literature | 1. THI |
| Zhou wen(2016), China(64) | <2 years , ND, neurogenic | 60 | AT / AT | SI19, GB2, TE17, GB20, LI4, TE5, LR2, GB40, GB41, ST40, ST44, BL23, KI3, CV4, CV6, ST36, BL20 | ND | 1. THI |
| Zhou Chaoxiong(2014), China(65) | ND, ND, ND | 60 | EA / EA | GB12, SI19, GB2, TE21, TE3, GB43 | literature | 1. THI |
| 周航(2017), China(66) | 6-36 months, ND, neurogenic and 肝火上扰型 and neurogenic | 64 | EA / AT | TE3, TE21, SI19, GB2, TE17, GB43 | literature | 1. THI |
| ZHOU Xiao-ming(2016), China(67) | ND, ND, ND | 82 | intradermal needle / Injection(medication) | 鼻鍼 : 颈肩, 上肢, 心肺, 肝胆, 脾胃, 二指肠, 肾, 腰腹, 下腹, 腿, 足, 肾 | experience of clinical acupuncturists | 1. THI |
| 朱喜艳(2020), China(68) | <5 year, one or both sides, simple | 82 | AT / medicaiton | TE21, GB2, SI19, SP10, ST40, TE3, TE17, Ex-HN1 | ND | 1. THI 2. SDS 3. SAS 4. SF-36 |
| 陈丽华(2015), China(69) | 3 months-10 year, ND, ND | 55 | AT + H-med / H-med | SI19, GB2, TE21, TE17, GB12, GV20, Ex-HN1, GB43, LR3, LR2, ST40, GB34, ST44, CV4, KI3, KI6, ST36, CV6, SP6, SP10 | literature | 1. THI |
| 蔡琼珊(2014), China(70) | ND, ND, neurogenic tinnitus | 41 | EA / AT | LI19, ST7, 牵正, TE21, GB2, SI19, BL23, TE3 | literature | 1. THI 2. PTA |
| 崔秀亭(2015), China(71) | repeated 1 month≤ or continuous 5 days≤, ND, 感音神经性 and 肾精亏损型 | 72 | AT / AT | GV20, GV24, SI3, SI9, ST36, CV12, ST40, SP6, KI3, KI7, CV4, TE21, GB2, TE17, TE3, GB43 | literature | 1. THI |
| Cui Yong(2021), China(72) | ND, one or both sides, neurogenic | 76 | AT + H-med / medication | GB2, SI19, ST40, TE17, SP10, TE3, Ex-HN1 | TCM model | 1. THI |
| Shen Mingxue(2017), China(73) | Chronic, ND, idiopathic | 72 | AT + moxa / AT | 后线, GB2, GB31, 肾关(양릉천下 1.5寸), TE5, TE3, GB20, LI4, LR2, GB40, GB41, ST40, ST44, KI3, CV4, CV6, ST36, SI19, TE17, GB43 | TCM model | 1. THI |
| HE Danhong(2019), China(74) | 3 months-1 year, one or both sides, subjective | 100 | AT + H-med / H-med | SI19, GB2, TE17, TE21, LR3, LI4, BL20, ST36, SP6, BL23, KI3 | TCM model | 1. THI |
| Ye Yonghao(2017), China(75) | <1 year, one side, spleen&stomach weakness type | 66 | AT / AT | KI19, ST24, KI17, SP15, 上风湿点, KI13, SI19, TE17, TE5, LI4, LR3, ST40, KI3, BL23, ST36 | Follow SDb | 1. THI |
| 胡微(2020), China(76) | Acute(<3 months) , one or both sides, idiopathic and kidney essence deficiency model | 60 | AT + moxa / medicaiton | GB2, TE21, TE17, GB20, BL20, BL21, ST36, CV12 | Follow SDb | 1. THI 2. TEQ 3. PTA |
| HUANG Shanshan(2020), China(77) | <6 months, one or both sides, subjective | 60 | AT / AT | SI19, TE17, KI3, BL23, PC7, HT7, GV20, Ex-HN3 | TCM model | 1. THI |
| XIN Meiqian(2018), China , BAO Yehua ,CHU Jiamei , et al, China(78) | Acute(<6 months) , one or both sides, subjective | 60 | AT / AT | SI19, GB2, TE17 | TCM model | 1. VAS 2. THI |
| 李金飞, et al.(2021), China(79) | Chronic(3 months<), ND, idiopathic, 脾胃虚弱 | 160 | AT + acupoint pressure, external H-med / medication | TE21, SI19, GB2, TE17, ST36, SP6, GV20, CV12, CV6, ST25 | ND | 1. THI, 2. TEQ, 3. HAMA, 4. PSQI |
| 王承惠, et al.(2021), China(80) | ND,ND, idiopathic, 肝气郁结 | 74 | AT + H-med / H-med | SI19, TE21, GB2 | ND | 1. THI |
| 姚卫杰, et al.(2021), China(81) | Chronic(6 months <), ND, idiopathic, 肝火上扰, TEQ 2≤ | 78 | AT / medication | TE21, SI19, TE17, GB12, TE3, LR3 | ND | 1. THI 2. TEQ |
| 建江岩(2022), China(82) | Chronic(3 months <), ND, neurogenic, tinnitus degree 2≤ | 118 | EA+medication / medication | TE17, SI19, GB2, LR3, GB40, TE3, ST36, CV6, BL20, BL17, SP10, BL23, CV4 | ND, follow SD | 1. THI |
| 李成龙, et al.(2022), China(83) | ND,ND,subjective | 90 | Warm needling+medication/ Warm needling(changes of moxibustion dose) | GB2, TE17, GB20, GV20, GB43, TE3 | literature | 1. THI, 2. TEQ, 3. PTA |
| 潘嘉欣, et al.(2022), China(84) | 1 year >, ND, idiopathic, 肾精亏虚, TEQ 2-4 | 60 | AT/AT | HN1-GB2, GV20-TE20, HN1-TE18, KI3, BL23 | TCM model | 1. THI |
| 王茗茗, et al.(2022), China(85) | 7 days <, ND, neurogenic, THI 18≤, with a hearing level of 25dB < | 76 | AT+medication / medication | TE21, GB2, SI19, GB12, TE17  KI6, KI3, GB43, LR3 | ND, follow SD | (1) THI,  (2) 耳鸣频率检查,  (3) SAS,  (4) SDS |
| 王小月, et al.(2022), China(86) | ND,ND, senile, 老年肾虚 | 124 | AT ,EA +rTMS, moxibustion, cupping, medication / medication | CV12, CV6, CV4, ST25,  TE21, SI19, GB2, TE17, GV23, CV24, PC8 | ND | 1. TSIS, 2. VAS, 3. THI, 4. SF-36 |
| 洪秋阳, et al.(2022), China(87) | Acute(3 months >), ND, neurogenic | 70 | AT , warm AT, bloodletting+ medication/ AT+medication | AT : SI19, GV20, GV24, GB2, LI4, GB41, TE17, TE3, LR3  Warm AT : GB12, GB20, TE17  Bloodletting : HN6 | Experience of clinical acupuncturists | 1. TEQ, 2. THI, 3. VAS, 4. HAMA, 5. PSQI |
| 刘仕伟, et al.(2022), China(88) | ND,ND, subjective, idiopathic, 肝气郁结 | 66 | AT+ H-med / H-med | GB2, GB3, GB8, GB20, GB43, LR3, TE17, TE21, TE3, TE5 | ND | 1. TEQ, 2. THI, 3. VAS, 4. SAS, 5. SDS |
| 刘娟, et al.(2022), China(89) | ND,ND, 肾精亏虚 | 98 | AT / AT | TE21, SI19, GB2, TE17, CV4, BL23 KI3, BL58, BL64, KI4 | TCM model | 1. THI |
| 杨春梅, et al.(2022), China(90) | Acute(3 months >), ND, neurogenic | 48 | AT + medication, rTMS / medication | TE21, SI19, GB2, TE17, GB20, TE3, TE5 | ND | 1. THI, 2. VAS, 3. SAS, 4. AIS |
| 武峙璇, et al.(2023), China(91) | 3 years >, ND, subjective, have MTrPs | 60 | AT / AT | Ashi(MTrPs), TE21, SI19, GB2, GV20, HN1, GB20, TE17, TE3, LR3, | TCM model | 1. THI, 2. TEQ, 3. SAS, 4. VAS |
| 范红霞, et al.(2023), China(92) | ND, ND, neurogenic, 肝气郁结 | 104 | AT + 调息法 / medication | TE21, SI19, GB2, TE17, LR3, GB40, TE3 | TCM model | 1. THI |
| 王林林, et al.(2023), China(93) | Chronic(12 months <), ND, idiopathic, 脾肾两虚 | 83 | AT/ AT | GV20, HN1, TE21, GB2, LU9, PC6, ST36, CV12, ST25, CV6, CV4, GB34, SP6, KI7, KI3, KI6, SP6, KI6, BL62, TE17, ST40, ST37 | TCM model | 1. TEQ, 2. THI |
| 王成芳, et al.(2023), China(94) | 1 month <, ND, neurogenic, 肾精亏损 | 80 | AT+medication/ medication | GV20, HN3, CV4, CV6, PC6, KI3, SI19 | TCM model | 1. THI, 2. PSQI |
| 王玥, et al.(2023), China(95) | Chronic(3 months <), ND, cervical, TFI 25-90, NBQ ≥14 | 86 | AT / AT | CV12, CV10, CV6, CV4, SP15, KI19, CV11, KI17, ST24  GB2, TE17, GB8, TE3, GB40, KI3 | TCM model | 1. THI, 2. TFI, 3. NBQ |
| 刘广宇,et al.(2023), China(96) | Chronic(1 year <), ND, subjective, 脾胃虚弱, right-handed, with a hearing level of 35dB <, THI≥38 | 65 | AT + narrowed-band noise masking, cognitive behavioral Therapy/ narrowed-band noise masking, cognitive behavioral Therapy | GB2, GB8, KI3, SP3, TE17, TE6 | TCM model | 1. SAS, 2. SDS, 3. MMSE, 4. THI, 5. PSQI |
| 谢雪萍,et al.(2023), China(97) | ND, ND, neurogenic | 60 | AT + medication / medication | GB20, TE17, GB12, LI4, GV24, GB13, GB2, GB43, TE21, TE3  TE5, GV14, LR3, GB40, ST40, ST44, PC6, SP10, BL23, KI3  ST36, CV6 | ND, follow SD | 1. THI, 2. VAS, 3. SAS, 4. HAMD |
| 陈炳力, et al.(2023), China(98) | ND, ND, 肝火上扰 | 60 | AT / AT | TE21, SI19, GB2, TE17, LR3, LR2 | Experience of clinical acupuncturists | 1. THI, 2. TEQ, 3. SAS |
| Ali Mohamed Ali Ismail(2023), Egypt(99) | Chronic(6 months <), ND, idiopathic, subjective, BMI > 30 kg/m 2 | 60 | AT+EA / sham A(placebo) | TE3, TE5, TE17, TE18, TE19, TE20, TE21, TE22, GB2, GB8, GB20, LI4, LI11, KI3, SP6, ST36, ST25, GB28, CV4, CV9, CV12 | Previous study | 1. THI, 2. VAS |
| Enikö Julia Manz  (2021), Germany(100) | Acute(<3 months), one or both sides, subjective, idiopathic tinnitus | 48 | AT/care group | KI3, KI6, KI7, TE1, TE5, TE17, TE19, TE21, SP2, SP8, HT7, LI3, LI4, LI11, SI3, SI19, SP3, SP4, SP6, SP10, LU7, LU9, LR2, LR3, LR8 | Traditional Chinese medicine model | 1. VAS 2. Mini TQ-12 3. TFI 4. Tinnitus loudness |
| 尚艳杰, et  al.(2021), China(101) | 30 days <, ND, 脾虚 | 60 | Warm needling+ H-med / H-med | TE21, SI19, GB2, TE17, ST36, CV6 | ND | 1. THI |

TG : Treatment group, CG : Control group, ND : Not described, AT : acupuncture treatment, TCM : traditional Chinese medication, HRV : Heart rate variability, EA : electro-acupuncture treatment, TENS : transcutaneous electrical nerve stimulator, PTA : Pure-tone audiometry, SDa : speech discrimination, SDb : syndrome differentiation, TSIS : tinnitus severity assessment scale, HAMA : Hamilton Anxiety Scale, HAMD : Hamilton Depression Scale, TEQ : Tinnitus Evaluation Questionnaire, SAS : Zung Self-Rating Anxiety Scale, SDS : Zung self-rating depression scale, HADS : Hospital Anxiety and Depression Scale, PSQI : Pittsburgh sleep quality index, TCD : transcranial doppler, LM : tinnitus loudness matching, SCL-90 : Symptom Check List-90-Revised, TSQ : Tinnitus severity Questionnaire, TRQ : Tinnitus response questionnaire, THQ : Tinnitus hinder questionnaire, TQ : Tinnitus questionnaire, DASS-21 : depression - Anxiety - Stress Scale, TSS : tinnitus severity score, SF-36 : Short Form (36) Health Survey.

Summary of included domestic articles (double-blind RCTs)

| First Author (year), Country | Included patients(period, direction, character) | Sample size (TG/CG) | Control intervention (TG/CG), | Acupoints | Criteria for treatment | Outcomes | Results(before Tx/after Tx)‡ | p value§ |
| --- | --- | --- | --- | --- | --- | --- | --- | --- |
| Laureano (2016), Brasil(102) | Chronic(least 3 months), one or both sides, subjective, and continuous | 30/27 | AT/sham A(placebo) | GV20, TE17, GB8, SI19, GB2, TE21, CV23, GB20, TE2, TE5, SI2, GB43, GB41, GV4, KI3, BL23, BL19, BL18, CV4 | Traditional Chinese medicine model | 1. THI 2. VAS 3. SPECT scan 4. HAS 5. BDI | (1)48.00±19.45/33.19±17.53  (2)6.22±2.36/5.72±2.48  (3)ND  (4)21.60±11.38/18.30±11.20  (5)13.13±10.00/11.09±9.55 | (1)Sigb  (2)NAb  (3)NAb  (4)NAb  (5)NAb |
| Sun Woo Jeon (2012), Korea(103) | Chronic(least 6 months), both sides, 18–60 years old, and without moderate or severe hearing loss | 17/16 | AT/sham A(placebo) | GB2, GB12, GB20, GB21, GV14, GV15, GV16, GV20, TE17, TE21, TE22, SI19, BL2, LI20, Ex-HN3 | ND | 1. THI 2. VAS 3. PTA 4. SD | (1)24.36±27.51a  (2)29.35±23.41a  (3)ND  (4)ND | (1)NA  (2)Sig  (3)NA  (4)NA |
| Ihsan Kuzucu, (2020), Turkey(104) | Chronic(least 1 year), one or both sides, THI>38 | 53/52 | AT/sham A(placebo) | TE21, SI19, GB2, TE22, ST7, TE17, GB20, TE5, KI3 | Traditional chinese medicine model | 1. THI 2. VAS 3. PTA 4. SD | (1)61.11±12.70/40.26±16.56  (2)7.26±0.98/3.66±1.38  (3)ND  (4)ND | (1)Sig  (2)Sig  (3)NA  (4)NA |
| Naderinabi (2018), Iran(105) | Chronic(least 6 months), one or both sides, non-pulsatile tinnitus | 44/44 | AT/sham A(placebo) | GB2, GB20, TE21, SI19, TE17, TE3, TE5, LI4, SI6 | ND | 1. Tinnitus loudness/VAS 2. TSI | (1)9.56±0.43/2.25±0.27  (2)43.84±2.81/23.11±1.03 | (1)Sig  (2)Sig |
| Mehrdad  Rogha(2011),  Iran(106) | Chronic, ND, ND | 27/27 | AT/sham A(placebo) | TE17, GB2, SI19, TE21 | Traditional chinese medicine model | 1. TSI 2. Tinnitus loudness/VAS | 1. 46.9±7.9/31.7±11.1 2. 8.9±1.3/5.3±3 | (1)Sig  (2)Sig |

Abbreviations: TG: Treatment group, CG: Control group, ND: Not described, C-med: Chinese medication, TSI: Tinnitus severity index, HAS: Hamilton Anxiety Scale, BDI: Beck Depression Inventory, PTA: Pure-Tone Audiometry, SD: Speech Discrimination, TEQ: Tinnitus Evaluation Questionnaire, Mini TQ-12: Mini Tinnitus Questionaire-12, TFI: Tinnitus Functional Index, Tx: treatment

‡Mean±Standard deviation, a : mean percent change of THI or VAS from baseline to 3 months after, b : statistically significant (p＜0.05) change from before treatment

§ Sig (Significant) indicates statistically significant (p＜0.05) compared with CG; NA Sig (Not significant) indicates no statistically significance difference between TG and CG.

**References**

1. Jackson A, MacPherson H, Hahn S. Acupuncture for tinnitus: a series of six n= 1 controlled trials. Complementary therapies in medicine. 2006;14(1):39-46.

2. Juan Y-H, Hsu C-T, Hwang J-H. Outcomes of triple-combination therapy for chronic tinnitus. in vivo. 2019;33(5):1707-12.

3. Dong Y, Wang Y. Cervical tinnitus treated by acupuncture based on" jin" theory: a clinical observation. Zhongguo Zhen jiu= Chinese Acupuncture & Moxibustion. 2016;36(4):369-72.

4. 刘翔维. 针刺治疗神经性耳鸣的疗效观察及基于静息态fMRI的机制研究 [硕士]: 安徽中医药大学; 2019.

5. 李洋, 李瑞. 对李瑞教授用针灸治疗耳鸣临床经验的分析. 当代医药论丛. 2017;15(8):8-10.

6. 马圆. 以少阳经穴为主治疗耳鸣的临床研究: 北京中医药大学; 2018.

7. 王月梅. 捏鼻鼓气联合温针灸治疗神经性耳鸣的临床疗效及有效性分析. 中国医学文摘(耳鼻咽喉科学). 2021;36(03):31-3+7.

8. 张璐. 员利针治疗原发性耳鸣的临床疗效观察: 北京中医药大学; 2019.

9. 郑良玉. Clinical study of electro-acupuncture in the treatment of tinnitus. Anhui University of Chinese Medicine. 2019.

10. 朱梦蝶, 李湘胜, 肖玉坤, 谢东海, 聂瑾, 樊涛. 电针联合药物治疗对主观性耳鸣患者听性脑干反应测试的影响. 中医药导报. 2017;23(5):87-9.

11. 张雅婷, 查必祥, 石海平, 樊吟秋, 郑云子, 戎志豪, et al. 基于fMRI初探宁神通窍法针刺对主观性耳鸣患者前扣带回与全脑功能连接的调控作用. 中国针灸.1-14.

12. Tu J-f, Kim M, Yang J-w, Li Q-q, Litscher G, Wang L, et al. Influence of acupuncture on autonomic balance in adult tinnitus patients: an exploratory study. Current Medical Science. 2019;39:947-53.

13. Kim BH, Kim K, Nam HJ. A comparative study on the effects of systemic manual acupuncture, periauricular electroacupuncture, and digital electroacupuncture to treat tinnitus: a randomized, paralleled, open-labeled exploratory trial. BMC complementary and alternative medicine. 2017;17(1):1-7.

14. Kim BH, Moon YK, Kim MH, Nam HJ. Comparing the effects of manual acupuncture, electroacupuncture, and transcutaneous electrical nerve stimulation on chronic tinnitus: a randomized controlled trial. Integrative Medicine Research. 2020;9(2):100409.

15. Ghahfarokhi） 波MB. 针刺治疗耳鸣疗效的临床观察 [硕士]: 北京中医药大学; 2018.

16. Ning） 蔡TM. 基于《针灸资生经》挖掘优选穴位治疗耳鸣的临床观察 [博士]: 广州中医药大学; 2018.

17. 耿坚雯, 王黎. 柴胡温胆汤联合针刺治疗耳鸣的临床疗效观察. 广州中医药大学学报. 2018;35(03):439-43.

18. 高嘉琳, 翟军. 不同针灸方法对神经性耳鸣的治疗效果研究. 收藏. 2018;64.

19. 高云竹. 针刺头穴晕听区配合耳周穴治疗神经性耳鸣的疗效观察 [硕士]: 黑龙江中医药大学; 2015.

20. 郭佳. 腹针结合局部针刺治疗特发性耳鸣（虚证）的临床研究 [硕士]: 湖北中医药大学; 2018.

21. Duan S, Zhou H, WU S. Clinical Observations on Acupuncture Treatment of Tinnitus Under the Theory of Kidney and Sanjiao Communication. Shanghai Journal of Acupuncture and Moxibustion. 2016:440-2.

22. 梁修朗. 调肝升阳益气针法治疗神经性耳鸣的临床研究 [硕士]: 广西中医药大学; 2018.

23. 鲁佳. 岭南火针点刺井穴为主治疗神经性耳鸣的疗效观察 [硕士]: 广州中医药大学; 2019.

24. 刘佳慈. 子午流注纳支法针刺治疗肾精亏损型耳鸣的临床研究 [硕士]: 广州中医药大学; 2018.

25. 刘仕伟. 疏肝利胆针法治疗郁气结型耳鸣的临床随机对照研究 [硕士]: 成都中医药大学; 2019.

26. 刘艳, 王坤, 张茂亮, 贺诗峰, 王艳艳, 赵先一. 阴阳九针结合董氏奇穴针刺对脾胃气虚型神经性耳鸣患者耳鸣响度及中枢神经递质含量的影响. 河北中医. 2020;42(08):1227-32.

27. 刘永. 体针联合耳针治疗肾精亏损型耳鸣的临床疗效观察 [硕士]: 山东中医药大学; 2016.

28. 李莉, 丁丽玲, 王祖红, 易荣, 方永江, 郭翠萍. 管氏耳病六聪穴配合天竺灸治疗神经性耳鸣疗效观察. 上海针灸杂志. 2018;37(12):1395-8.

29. 李新. 中药联合中医针灸、推拿在颈源性耳鸣治疗中的应用价值. 包头医学院学报. 2017;33(03):118-9.

30. 李静, 郭会敏, 张晓哲, 杨继军. 针刺捻转泻法治疗肝火上扰型耳鸣临床观察. 中国针灸. 2016;36(12):1263-5.

31. 李晶晶, 林国华, 陈世云, 秦烨, 周鹏, 林诗雨, et al. 发蒙法配合子午流注针法治疗神经性耳鸣疗效观察. 上海针灸杂志. 2019;38(03):302-6.

32. 李珍珍. 调气通窍针刺法治疗耳鸣的临床研究 [硕士]: 湖北中医药大学; 2018.

33. 李鑫. 针刺“通耳方”联合耳尖放血治疗特发性耳鸣急性期的临床研究 [硕士]: 北京中医药大学; 2021.

34. 马莉, 陈玉. 捏鼻鼓气联合温针灸治疗神经性耳鸣的临床研究. 中医药导报. 2020;26(14):77-9.

35. 范小利, 李丽. 针药并用配合心理干预治疗神经性耳鸣疗效观察. 上海针灸杂志. 2014;33(05):430-2.

36. 伏云鹤. 八廓理论指导下的腹针结合体针治疗肾精亏损型神经性耳鸣的临床研究 [硕士]: 南京中医药大学; 2019.

37. 封宇. 透刺法治疗肝火上扰型耳鸣的临床观察 [硕士]: 黑龙江中医药大学; 2020.

38. 石磊, 冷辉, 李媛, 孙海波, 郭庆革. 强刺激针刺手法治疗肝气郁结型耳鸣的临床疗效研究. 世界中西医结合杂志. 2016;11(04):540-3.

39. 聂晓琳. 针刺少阳经腧穴改善难治性突发性聋患者耳鸣症状的临床疗效观察 [硕士]: 成都中医药大学; 2019.

40. 宋珊. 针刺颈夹脊穴结合耳三针治疗神经性耳鸣的临床观察 [硕士]: 山西中医药大学; 2021.

41. 宋春侠, 刘经州, 徐立伟, 权兴苗, 时菁静, 刘玉兰, et al. 针药并用治疗痰瘀阻络型神经性耳鸣的疗效观察. 上海针灸杂志. 2020;39(05):555-8.

42. 申一鸣. 健康教育处方结合体穴埋线治疗特发性耳鸣的临床观察 [硕士]: 桂林医学院; 2018.

43. 谌苏容, 谭旭明, 费兰波, 向贤德. 针刺联合补中益气汤合磁朱丸治疗特发性耳鸣临床观察. 中国针灸. 2018;38(04):369-73.

44. 安声潘. 平衡针结合常规针刺治疗特发性耳鸣的临床研究 [硕士]: 广州中医药大学; 2019.

45. 於力. 补肾益聪针法治疗突发性耳鸣的临床疗效观察 [硕士]: 南京中医药大学; 2018.

46. 王琳. 国家标准二十四式单式手法中之“搓法”治疗神经性耳鸣的临床疗效观察 [硕士]: 黑龙江省中医药科学院; 2020.

47. 王芳瑜. 杵针治疗耳鸣的临床研究 [硕士]: 成都中医药大学; 2017.

48. 王昊, 董宝强. 针灸结合药物治疗神经性耳鸣临床研究. 辽宁中医药大学学报. 2018;20(11):149-50.

49. 汪晓玲, 王云甫. 辨证针刺配合五行音乐疗法治疗特发性耳鸣的疗效观察. 湖北中医药大学学报. 2016;18(02):85-8.

50. 姚艳玲, 刘昊, 陈佳利, 王丽芬. 刺络放血联合针刺治疗心肝火旺型耳鸣疗效观察. 现代中西医结合杂志. 2020;29(30):3340-4.

51. 尹韬. 耳周三穴深刺为主治疗主观性耳鸣的随机对照研究 [硕士]: 北京中医药大学; 2013.

52. 尹韬, 倪金霞, 朱文增. 耳周三穴深刺与浅刺治疗主观性耳鸣:随机对照研究. 中国针灸. 2015;35(10):1015-9.

53. 张觉予. 针刺俞募穴为主治疗肾精亏损型耳鸣的临床疗效观察 [硕士]: 广州中医药大学; 2018.

54. 张秀云. 针刺联合耳管灸治疗肾精亏损型主观性耳鸣的临床疗效观察 [硕士]: 山东中医药大学; 2017.

55. 张顺. 针指震颤行气法治疗肝肾亏虚型神经性耳鸣的临床研究 [硕士]: 云南中医药大学; 2020.

56. 张宁. 子午流注纳甲合原法治疗神经性耳鸣的临床研究 [硕士]: 长春中医药大学; 2018.

57. 张前福. 运用董氏奇穴配合传统腧穴治疗肾精亏损型耳鸣的临床研究 [硕士]: 上海中医药大学; 2019.

58. 张会会. 针刺配合雷火灸治疗肾精亏虚型耳鸣的临床研究 [硕士]: 长春中医药大学; 2017.

59. 丁皥. 赖氏通元法针刺治疗肾精亏损型神经性耳鸣的临床研究 [博士]: 广州中医药大学; 2019.

60. 曹奕, 江娜, 董海彦. 温针灸治疗耳鸣临床观察. 上海针灸杂志. 2014;33(12):1124-6.

61. 钟玉梅. 苇管灸结合针刺治疗神经性耳鸣的临床研究 [硕士]: 成都中医药大学; 2018.

62. 钟玉梅, 赵征宇, 成博, 陈瓞. 苇管灸配合针刺治疗神经性耳鸣临床观察. 上海针灸杂志. 2019;38(08):892-7.

63. 钟子琪. 针刺配合耳穴治疗肾精亏虚型耳鸣的临床研究 [硕士]: 新疆医科大学; 2017.

64. 周文. 针刺耳周三穴配合子午流注纳甲法治疗神经性耳鸣的临床研究 [硕士]: 云南中医学院; 2016.

65. 周朝雄. 电针配合穴位注射治疗耳鸣的临床研究 [硕士]: 广州中医药大学; 2014.

66. 周航. 中渚穴循经感传治疗肝火上扰型神经性耳鸣的临床研究 [硕士]: 黑龙江省中医药科学院; 2017.

67. 周晓明, 史莹莺, 虞定鹃, 梁伟平, 陈燕. 第二掌骨全息穴位埋线治疗耳鸣的临床研究. 上海针灸杂志. 2016;35(03):306-7.

68. 朱喜艳. 针灸配合中医药辨证施治治疗神经性耳鸣的疗效评估. 新疆中医药. 2020;38(03):31-3.

69. 陈丽华. 针刺治疗耳鸣的临床疗效观察 [硕士]: 成都中医药大学; 2015.

70. 蔡琼珊. 针刺治疗神经性耳鸣的临床观察 [硕士]: 福建中医药大学; 2014.

71. 崔秀亭. 升清阳针刺法治疗感音神经性耳鸣（肾精亏损型）的临床研究 [硕士]: 成都中医药大学; 2015.

72. 崔勇. 中医药联合针灸治疗神经性耳鸣的临床疗效. 中国医学文摘(耳鼻咽喉科学). 2021;36(03):42-4.

73. 沈明雪. 天竺灸结合针刺治疗神经性耳鸣的临床研究 [硕士]: 云南中医学院; 2017.

74. 贺丹红. 补中益气汤联合针刺治疗慢性特发性耳鸣临床研究. 新中医. 2019;51(08):75-8.

75. 叶永豪. 腹针治疗神经性耳鸣的临床研究 [硕士]: 广州中医药大学; 2017.

76. 胡微. 针刺结合百会灸治疗脾胃虚弱型原发性耳鸣的临床疗效观察 [硕士]: 福建中医药大学; 2020.

77. 黄闪闪. 调心安神补肾法针刺治疗肾精亏损型特发性耳鸣的临床疗效观察 [硕士]: 南京中医药大学; 2020.

78. 忻美茜, 包烨华, 楚佳梅, 乐梦巧. 针刺健耳穴配合耳周三穴治疗耳鸣的疗效观察. 浙江中医药大学学报. 2018;42(07):580-3.

79. 李金飞, 迟晨雨, 丁雷, 王嘉玺. 三联疗法治疗脾虚型耳鸣的疗效及对中枢神经递质的影响. 现代中西医结合杂志. 2021;30(36):4053-6+60.

80. 王承惠, 陈杰. 针刺联合中药治疗肝气郁结型耳鸣的疗效观察. 上海针灸杂志. 2021;40(09):1112-6.

81. 姚卫杰, 张治成, 郭向东, 柳普照, 杨晓刚. 针刺治疗特发性耳鸣肝火上扰型临床观察. 实用中医药杂志. 2021;37(09):1572-4.

82. 建江岩. 针灸辅治神经性耳鸣临床观察. 实用中医药杂志. 2022;38(03):420-2.

83. 李成龙, 张利达, 韩为, 计海生, 茅伟, 张鑫, et al. 不同灸量温针灸治疗主观性耳鸣的临床观察. 上海针灸杂志. 2022;41(03):279-84.

84. 潘嘉欣, 徐林新, 徐学妍, 李兰竹, 莫燕丽, 樊伟, et al. 卅型头穴透刺治疗肾精亏虚型耳鸣疗效观察. 上海针灸杂志. 2022;41(04):400-5.

85. 王茗茗, 单立影, 徐景利. 针灸疗法用于神经性耳鸣患者的疗效及对微循环的影响. 河北医药. 2022;44(11):1702-5.

86. 王小月, 夏文广, 张阳普, 罗蛟龙, 徐婷. 固元双通法针灸联合重复经颅磁刺激治疗老年肾虚型耳鸣的临床研究. 上海针灸杂志. 2022;41(01):55-60.

87. 洪秋阳, 曾沁, 刘晓静, 毛雪文, 沈凌宇, 李焕芹. 贺氏针灸三通法治疗神经性耳鸣急性期的临床观察. 中国中医急症. 2022;31(12):2184-7.

88. 刘仕伟, 黄小瑾, 郭耀光. 疏肝利胆针法治疗肝气郁结型耳鸣的临床研究. 中医临床研究. 2022;14(22):73-6.

89. 刘娟, 郭慧, 赵翠宏. 主客原络配穴针刺配合常规针刺治疗肾精亏虚型耳鸣的疗效观察及对血清sVCAM-1、ICAM-1水平的影响. 上海针灸杂志. 2022;41(11):1105-10.

90. 杨春梅, 张婷, 任庆萍, 赵晶. 针刺加常规疗法联合重复经颅磁刺激治疗神经性耳鸣的临床观察. 广州中医药大学学报. 2022;39(01):106-10.

91. 武峙璇, 徐雪娇, 韩数, 毛铁, 孙河, 李岩, et al. 筋膜松解针法结合常规针刺治疗主观性耳鸣临床研究. 针灸临床杂志. 2023;39(02):12-6.

92. 范红霞, 李军, 杜昕, 王静西, 荣婷, 吝子椰. 颞三针配合调息法治疗肝气郁结型神经性耳鸣的临床研究. 河北中医药学报. 2023;38(05):37-40.

93. 王林林, 雷刚, 赵颜俐, 苟春雁. 切脉针灸治疗慢性耳鸣(脾肾两虚证)的临床研究. 中医眼耳鼻喉杂志. 2023;13(04):190-2+6.

94. 王成芳, 汪芸芸, 周名誉. 通元法针刺对肾精亏损型神经性耳鸣病人中医症候积分、THI评分及睡眠质量的影响. 蚌埠医学院学报. 2023;48(07):959-62.

95. 王玥, 陆瑾, 李静, 施娟娟, 魏心昶. 腹针结合针刺运动治疗颈源性耳鸣疗效观察. 现代中西医结合杂志. 2023;32(18):2574-8.

96. 刘广宇, 谭君颖, 霍岩, 张剑宁, 李明. “治鸣六穴”治疗脾胃虚弱型耳鸣患者的临床疗效观察及脑效应机制研究. 山东大学耳鼻喉眼学报. 2023;37(04):53-61.

97. 谢雪萍, 阙榕彩, 卢圣友. 针刺治疗法对神经性耳鸣患者的临床疗效研究. 中外医疗. 2023;42(19):176-80.

98. 陈炳力, 侯文光, 杨文佳, 阮铄荃, 陈跃来, 施茵. 郑氏针刺弹震手法治疗肝火上扰型耳鸣的临床疗效. 中华中医药杂志. 2023;38(05):2477-80.

99. Ismail AMA. Lipid Profile Response to Acupuncture in Obese Patients with Subjective Tinnitus: a Randomized Controlled Trial. JAMS Journal of Acupuncture and Meridian Studies. 2023;16(1):11-9.

100. Manz EJ, Sertel S, Szecsenyi J, Plinkert P-K, Joos S. Acupuncture as Complementary Treatment for Acute Tinnitus: A Randomized Controlled Pilot Study. Complementary Medicine Research. 2021;28(2):96-103.

101. 尚艳杰, 郭浩东, 钱雨彤, 喻燕鸣, 何艺博. 温针灸联合益气聪明汤治疗脾虚型耳鸣的临床观察. 中国中医药科技. 2022;29(06):1092-4.

102. Laureano MR, Onishi ET, Bressan RA, Neto PB, Castiglioni MLV, Batista IR, et al. The effectiveness of acupuncture as a treatment for tinnitus: a randomized controlled trial using 99m Tc-ECD SPECT. European radiology. 2016;26:3234-42.

103. Jeon SW, Kim KS, Nam HJ. Long-term effect of acupuncture for treatment of tinnitus: a randomized, patient-and assessor-blind, sham-acupuncture-controlled, pilot trial. The Journal of Alternative and Complementary Medicine. 2012;18(7):693-9.

104. Kuzucu I, Karaca O. Acupuncture treatment in patients with chronic subjective tinnitus: a prospective, randomized study. Medical acupuncture. 2020;32(1):24-8.

105. Naderinabi B, Soltanipour S, Nemati S, Saberi A, Parastesh S. Acupuncture for chronic nonpulsatile tinnitus: A randomized clinical trial. Caspian Journal of Internal Medicine. 2018;9(1):38.

106. Rogha M, Rezvani M, Khodami AR. The effects of acupuncture on the inner ear originated tinnitus. J Res Med Sci. 2011;16(9):1217-23.
